# Supplementary material
Source: PubMed Central journal article supplement (PMC2900914)
Supplement: NIHMS212976-supplement-CDP-choline.pdf [file NIHMS212976-supplement-CDP-choline.pdf]

**Supplementary Table 1.** Mean CSF-corrected Metabolite Concentrations at Baseline, Week 2, and 4 in MA dependent Patients Treated with CDP-choline or Placebo

| Metabolites               |          | Mean (SD) Concentrations, in mmol/L |                         | Analysis |          |
|---------------------------|----------|-------------------------------------|-------------------------|----------|----------|
|                           |          | CDP-choline Group<br>(n=16)         | Placebo Group<br>(n=15) | z        | p value* |
| Creatine                  | Baseline | 9.31 (1.24)                         | 9.61 (0.97)             | 0.11     | 0.91     |
|                           | Week 2   | 9.31 (1.27)                         | 9.52 (1.19)             |          |          |
|                           | Week 4   | 9.38 (1.18)                         | 9.44 (1.26)             |          |          |
| NAA                       | Baseline | 9.94 (0.91)                         | 9.99 (0.82)             | 2.79     | 0.005    |
|                           | Week 2   | 10.12 (1.05)                        | 9.76 (0.74)             |          |          |
|                           | Week 4   | 10.48 (0.54)                        | 9.69 (0.97)             |          |          |
| Cho                       | Baseline | 2.75 (0.38)                         | 2.77 (0.29)             | 2.13     | 0.03     |
|                           | Week 2   | 2.79 (0.33)                         | 2.73 (0.28)             |          |          |
|                           | Week 4   | 2.85 (0.33)                         | 2.74 (0.30)             |          |          |
| myo-Inositol <sup>†</sup> | Baseline | 7.50 (1.25)                         | 7.67 (1.66)             | 1.18     | 0.20     |
|                           | Week 2   | 7.34 (1.20)                         | 7.57 (1.47)             |          |          |
|                           | Week 4   | 7.45 (1.20)                         | 7.59 (1.72)             |          |          |

CSF, cerebrospinal fluid; NAA, n-acetyl aspartate/n-acetyl aspartyl glutamate; Cho, phosphocholine/glycerophosphocholine; SD, standard deviation.

\*P values were calculated by the F test for the interaction between group and time in generalized estimating equation model. Age, sex, and each metabolite concentration at baseline were included as covariates.

<sup>†</sup>Data were unavailable for 4 participants because of poor reliability of determination.
